# Supplementary material
Source: Springer Nature journal article supplement (https://www.springermedizin.de/resource/supplementary/13045_2013_355_MOESM10_ESM.pdf/9661200)

-1.35 -0.1 0.57

BC BM

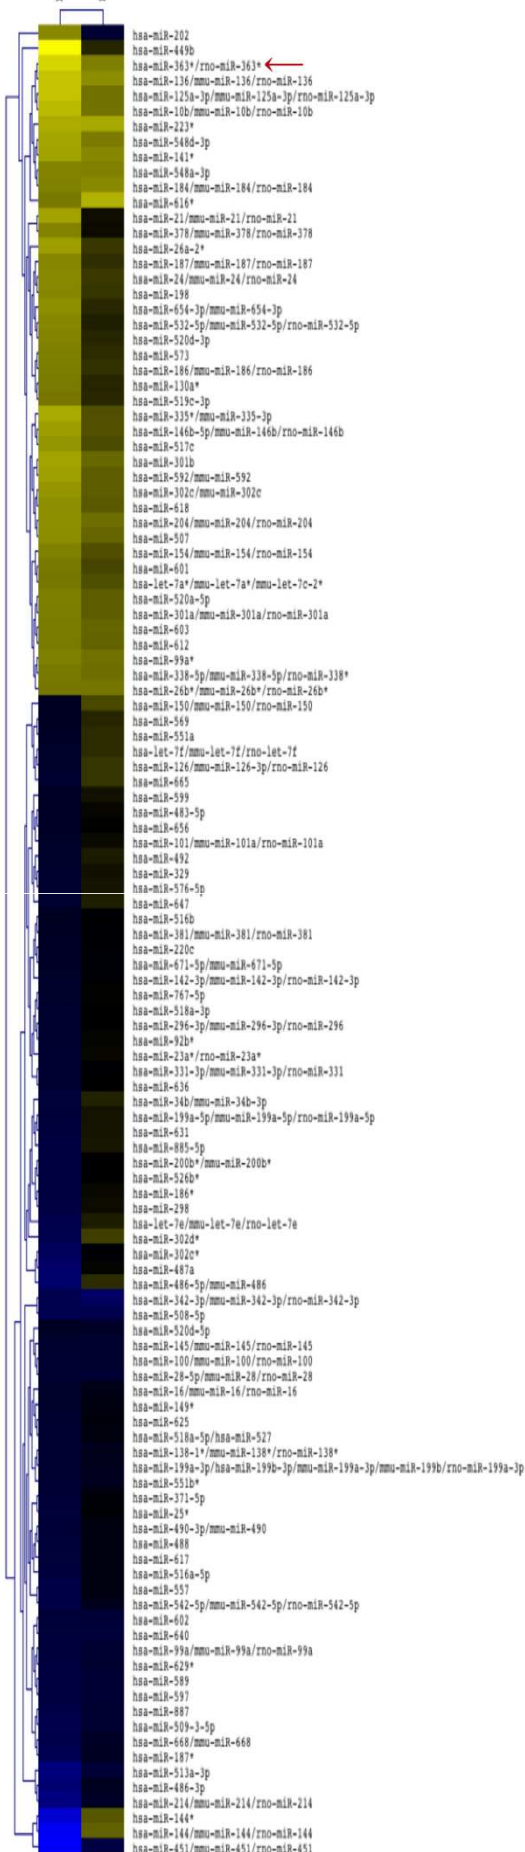

Supplement: MOESM10 [file 9661200]
